# Supplementary material for: High-performance 3D printing UV-curable resins derived from soybean oil and gallic acid
Source: Royal Society of Chemistry journal article supplement (doi:10.1039/d1gc01934a), 2021-01-01
Supplement: d1gc01934a1.pdf [file d1gc01934a1.pdf]

## Supporting Information

### High-performance 3D printing UV-curable resins derived from soybean oil and gallic acid

Guoqiang Zhu <sup>a</sup>, Jinshuai Zhang <sup>a</sup>, Jia Huang <sup>a</sup>, Xixi Yu <sup>a,b</sup>, Jianwen Cheng <sup>a,b</sup>, Qianqian Shang <sup>a</sup>,  
Yun Hu <sup>a</sup>, Chengguo Liu <sup>a,\*</sup>, Lihong Hu <sup>a</sup>, Yonghong Zhou <sup>a</sup>

#### S1. Characterization of HEMA

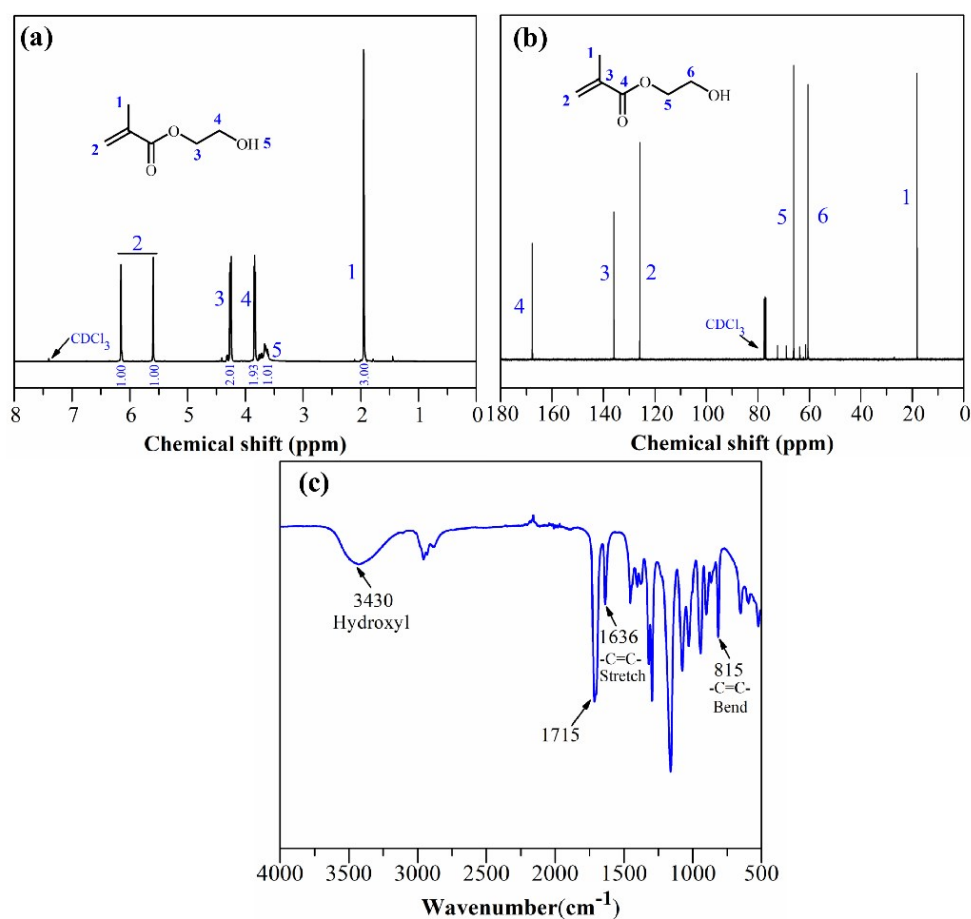

**Fig. S1** (a) The <sup>1</sup>H NMR spectra, <sup>13</sup>C NMR spectra and FT-IR spectra of the diluent HEMA.

The HEMA is a colorless transparent liquid with a viscosity of 6 mPa·s at room temperature.

<sup>1</sup>H NMR (CDCl<sub>3</sub>, δ ppm) 6.14 (s, 1H), 5.60 (m, 1H), 4.28 (t, 2H), 3.84 (t, 2H), 3.69 (m 1H), 1.95 (s, 3H).

<sup>13</sup>C NMR (CDCl<sub>3</sub>, δ ppm) δ 167.69 (s), 135.95 (s), 125.89 (s), 66.13 (s), 60.56 (s), 18.09 (s).

FT-IR (cm<sup>-1</sup>) 3430, 2957, 1715, 1636, 1453, 1319, 1296, 1161, 1077, 1030, 942, 901, 815, 652, 523.

## S2. Possible mechanism of gelled during the synthesis of GMAESO

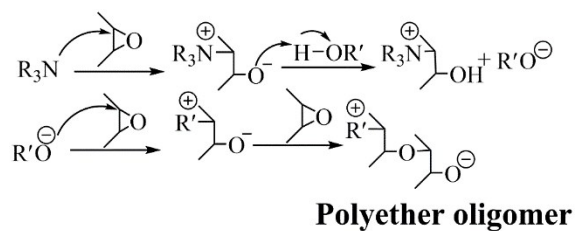

Fig. S2 Possible mechanism of gelled during the synthesis of GMAESO.

## S3. Acid value of GATA/MAA

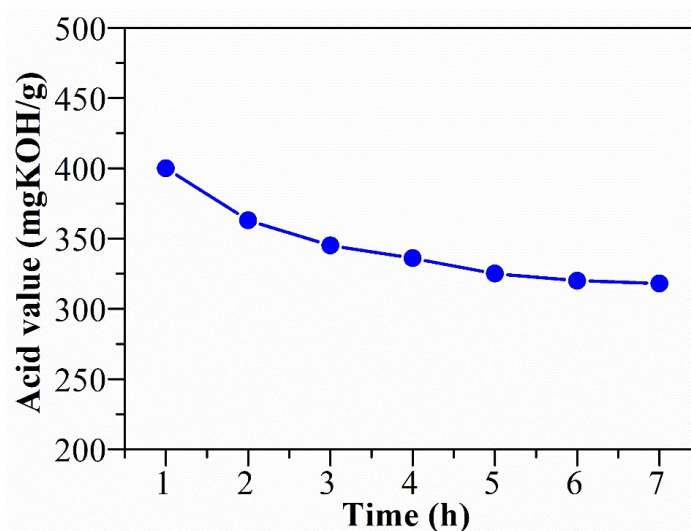

Fig. S3 Acid value vs. time during the synthesis of GATA/MAA.

## S4. Acid value of GMAESO

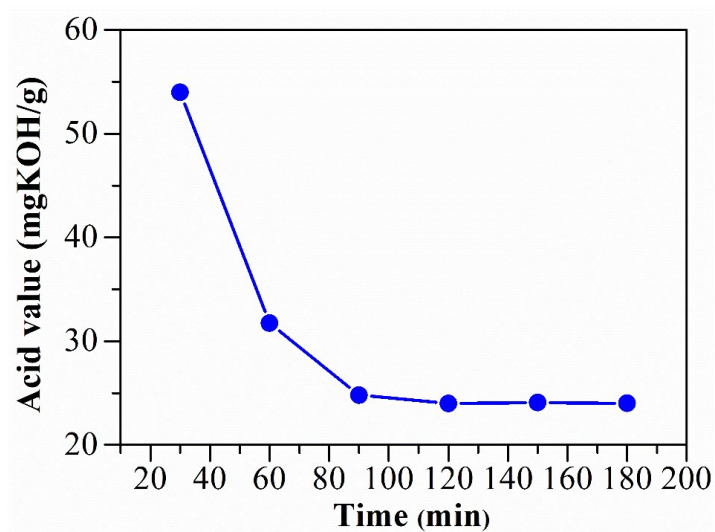

Fig. S4 Acid value vs. time during the synthesis of GMAESO.

## S5. FT-IR spectra of GA, MAAH, and GATA/MAA

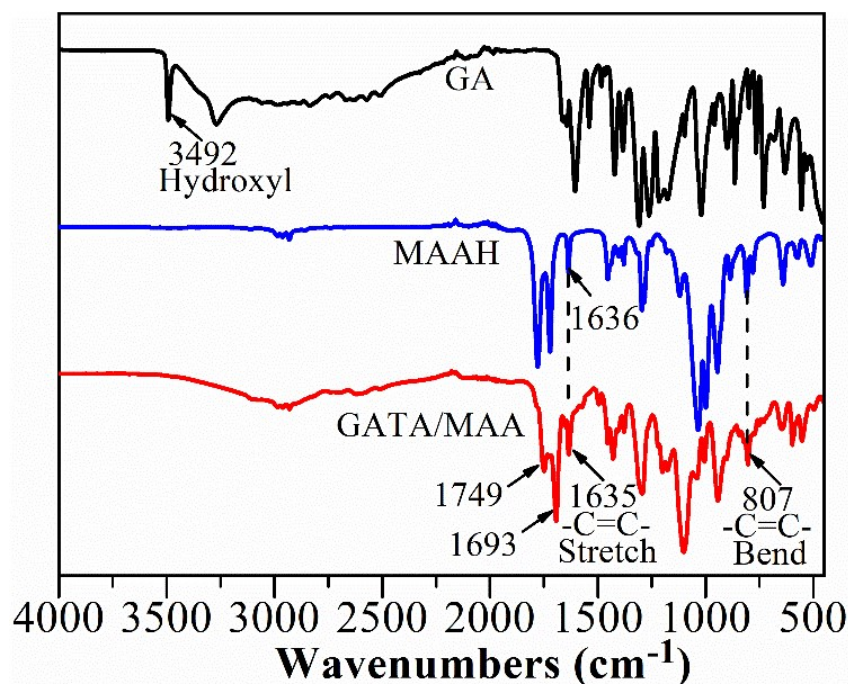

**Fig. S5** FT-IR spectra of GA, MAAH and GATA/MAA.

The synthesis of GATA/MAA was confirmed by FT-IR spectra (**Fig. S4**). In the GATA/MAA spectrum, the typical peaks at 2500-3400 cm<sup>-1</sup>, 1749 cm<sup>-1</sup>, 1693 cm<sup>-1</sup> and 1635/807 cm<sup>-1</sup> were assigned to carboxyl, carbonyl groups of MAA, ester carbonyl of GATA, and C=C bonds of GATA/MAA, respectively. In addition, the disappearance of the peak at 3492 cm<sup>-1</sup> belonging to phenolic hydroxyl groups can also indicate the successful synthesis of GATA/MAA. In the <sup>1</sup>H-NMR spectra of GATA/MAA (**Fig. 2(a)**), the peak at 11.5 ppm, 7.9 ppm, 5.6-6.5 ppm, and 1.9 ppm were assigned to the protons of carboxyl groups of MAA/GATA, benzene ring of GATA, vinyl groups GATA/MAA, and methyl groups of GATA/MAA, respectively. Besides, the disappearance of the peak at 3.50 ppm corresponding to the protons of GA hydroxyl groups also indicated the successful synthesis of GATA/MAA.

S6.  $^{13}\text{C}$  NMR spectrum of ESO

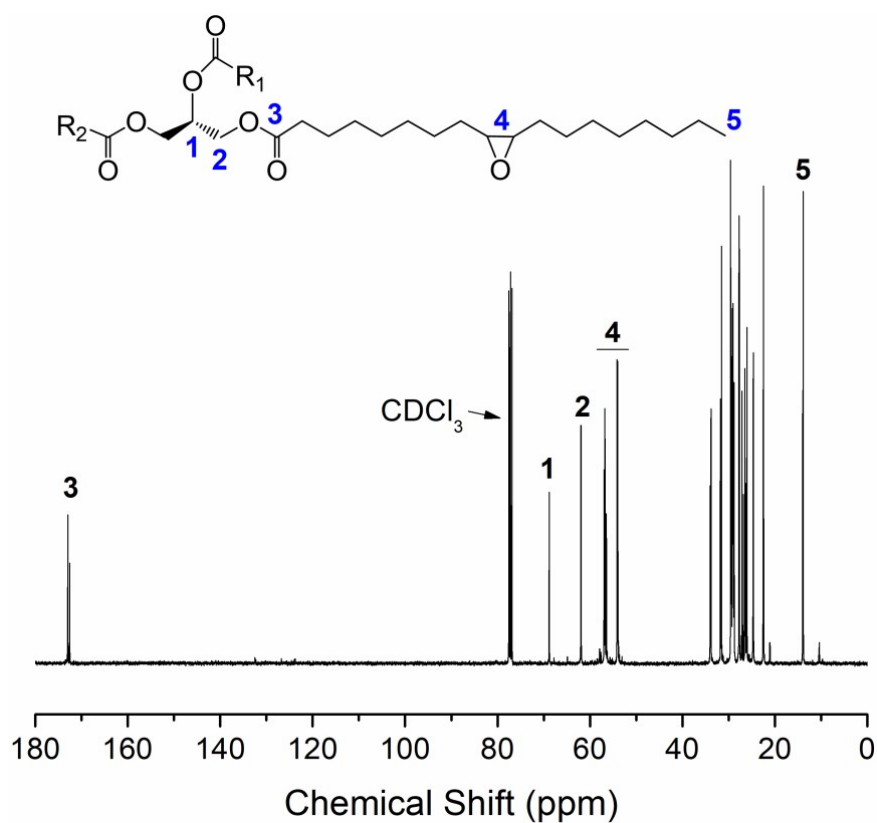

Fig. S6  $^{13}\text{C}$  NMR spectrum of ESO.

$^{13}\text{C}$  NMR ( $\text{CDCl}_3$ ,  $\delta$  ppm) 174.88 – 170.44 (m), 80.55 – 74.90 (m), 70.68 – 67.14 (m), 63.38 – 60.07 (m), 58.71 – 54.72 (m), 54.72 – 51.64 (m), 34.92 – 32.14 (m), 31.57 (s), 30.25 – 28.60 (m), 28.60 – 26.72 (m), 26.04 (s), 25.06 – 23.63 (m), 22.46 (s), 13.88 (s).

### S7. The line model and the surface image of line model

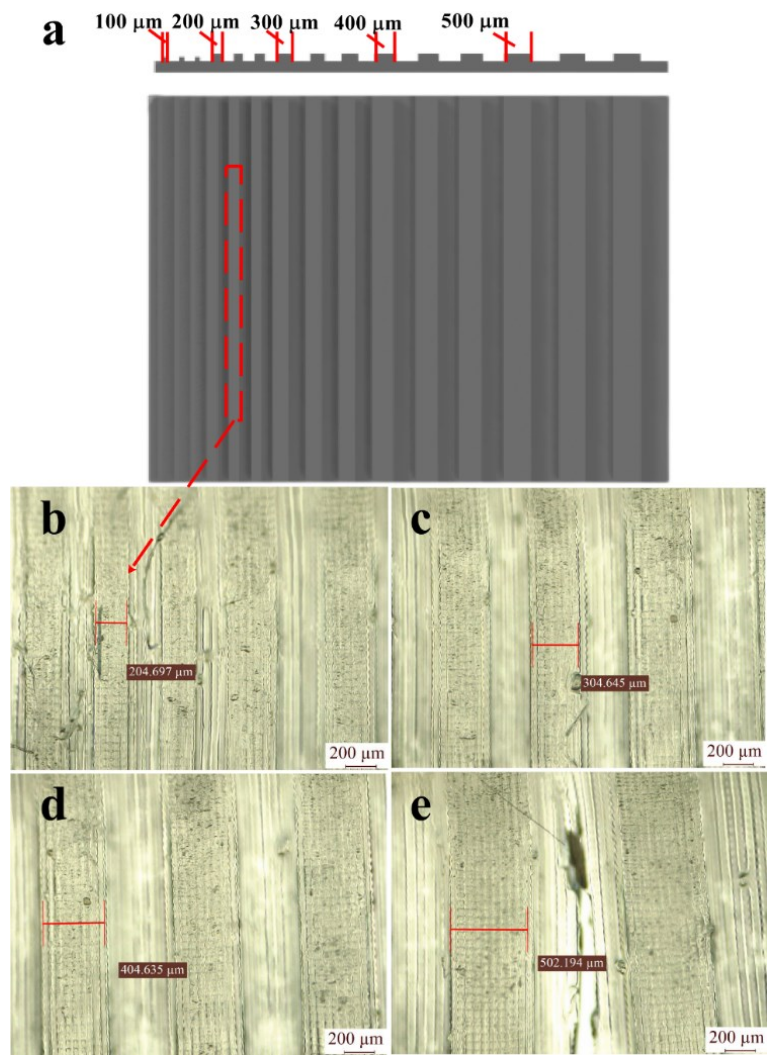

**Fig. S7** The line model and the surface image of line model.
